# Supplementary material
Source: ML conference proceedings conference paper supplement (https://proceedings.mlr.press/v189/dai23a.html)
Supplement: Supplementary file 1 [file dai23a-supp.pdf]

## Appendix A. Details of NNGP

In this section, we provide the correspondence between infinitely wide fully connected neural networks and Gaussian processes which is proved in Lee et al. (2017). We remark that other types of neural networks, e.g. CNN, also works compatibly with the NNGP. Here we consider L-hidden-layer fully connected neural networks with input  $\mathbf{x} \in \mathcal{R}^{d_{\text{in}}}$ , layer width  $n^l$  (for  $l$ -th layer and  $d_{\text{in}} := n^0$ ), parameter  $\boldsymbol{\theta}$  consisting of weight  $\mathbf{W}^l$  and bias  $\mathbf{b}^l$  for each layer  $l$  in the network, pointwise nonlinearity  $\phi$ , post-affine transformation (pre-activation)  $z_i^l$  and post-nonlinearity  $x_i^l$  for the  $i$ -th neuron in the  $l$ -th layer. We denote  $x_i^0 = x_i$  for the input and use a Greek superscript  $\mathbf{x}^\alpha$  to denote the  $\alpha$ -th sample. Weight  $\mathbf{W}^l$  and bias  $\mathbf{b}^l$  have components  $W_{ij}^l$  and  $b_i^l$  independently drawn from normal distribution  $\mathcal{N}\left(0, \frac{\sigma_w^2}{n^l}\right)$  and  $\mathcal{N}\left(0, \sigma_b^2\right)$ , respectively.

Then the  $i$ -th component of pre-activation  $z_i^0$  is computed as:

$$z_i^0(\mathbf{x}) = \sum_{j=1}^{d_{\text{in}}} W_{ij}^0 x_j + b_i^0$$

where the pre-activation  $z_i^0(\mathbf{x})$  emphasizes  $z_i^0$  depends on the input  $\mathbf{x}$ . Since the weight  $\mathbf{W}^0$  and bias  $\mathbf{b}^0$  are independently drawn from normal distributions,  $z_i^0(\mathbf{x})$  also follows a normal distribution. Likewise, any finite collection  $\{z_i^0(\mathbf{x}^{\alpha=1}), \dots, z_i^0(\mathbf{x}^{\alpha=k})\}$  which is composed of  $i$ -th pre-activation  $z_i^0$  at  $k$  different inputs will have a joint multivariate normal distribution, which is exactly the definition of Gaussian process. Hence  $z_i^0 \sim \mathcal{GP}(\mu^0, \mathcal{K}^0)$ , where  $\mu^0(\mathbf{x}) = \mathbb{E}[z_i^0(\mathbf{x})] = 0$  and

$$\mathcal{K}^0(\mathbf{x}, \mathbf{x}') = \mathbb{E}[z_i^0(\mathbf{x})z_i^0(\mathbf{x}')] = \sigma_b^2 + \sigma_w^2 \left( \frac{\mathbf{x} \cdot \mathbf{x}'}{d_{\text{in}}} \right)$$

Notice that any two  $z_i^0, z_j^0$  for  $i \neq j$  are joint Gaussian, having zero covariance, and are guaranteed to be independent despite utilizing the same input.

Similarly, we could analyze  $i$ -th component of first layer pre-activation  $z_i^1$ :

$$z_i^1(\mathbf{x}) = \sum_{j=1}^{n^1} W_{ij}^1 x_j^1 + b_i^1 = \sum_{j=1}^{n^1} W_{ij}^1 \phi(z_j^0(\mathbf{x})) + b_i^1.$$

We obtain that  $z_i^1 \sim \mathcal{GP}(0, \mathcal{K}^1)$ , where

$$\begin{aligned} \mathcal{K}^1(\mathbf{x}, \mathbf{x}') &= \mathbb{E}[z_i^1(\mathbf{x})z_i^1(\mathbf{x}')] \\ &= \sigma_b^2 + \sigma_w^2 \left( \frac{\sum_{j=1}^{n^1} \phi(z_j^0(\mathbf{x}))\phi(z_j^0(\mathbf{x}'))}{n^1} \right) \end{aligned}$$

Since  $z_j^0 \sim \mathcal{GP}(0, \mathcal{K}^0)$ , let  $n^1 \rightarrow \infty$ , the covariance is

$$\begin{aligned} & \mathcal{K}^1(\mathbf{x}, \mathbf{x}') \\ &= \sigma_b^2 + \sigma_w^2 \iint \phi(z)\phi(z') \\ & \quad \mathcal{N}\left(\begin{bmatrix} z \\ z' \end{bmatrix}; 0, \begin{bmatrix} \mathcal{K}^0(\mathbf{x}, \mathbf{x}) & \mathcal{K}^0(\mathbf{x}, \mathbf{x}') \\ \mathcal{K}^0(\mathbf{x}', \mathbf{x}) & \mathcal{K}^0(\mathbf{x}', \mathbf{x}') \end{bmatrix}\right) dz dz' \\ &= \sigma_b^2 + \sigma_w^2 \mathbb{E}_{z_j^0 \sim \mathcal{GP}(0, \mathcal{K}^0)} [\phi(z_i^0(\mathbf{x}))\phi(z_i^0(\mathbf{x}'))] \end{aligned}$$

This integral can be solved analytically for some activation functions, such as ReLU nonlinearity [Cho and Saul \(2009\)](#). If this integral cannot be solved analytically, it can be efficiently computed numerically [Lee et al. \(2017\)](#). Hence  $\mathcal{K}^1$  is determined given  $\mathcal{K}^0$ .

We can extend previous arguments to general layers by induction. By taking each hidden layer width to infinity successively ( $n^1 \rightarrow \infty, n^2 \rightarrow \infty, \dots$ ), we can conclude  $z_i^l \sim \mathcal{GP}(0, \mathcal{K}^l)$ , where  $\mathcal{K}^l$  could be computed from the recursive relation

$$\begin{aligned} \mathcal{K}^l(\mathbf{x}, \mathbf{x}') &= \sigma_b^2 + \sigma_w^2 \mathbb{E}_{z_j^{l-1} \sim \mathcal{GP}(0, \mathcal{K}^{l-1})} [\phi(z_i^0(\mathbf{x}))\phi(z_i^0(\mathbf{x}'))] \\ \mathcal{K}^0(\mathbf{x}, \mathbf{x}') &= \sigma_b^2 + \sigma_w^2 \left( \frac{\mathbf{x} \cdot \mathbf{x}'}{d_{\text{in}}} \right) \end{aligned}$$

Hence, the covariance only depends on the neural network structure (including weight and bias variance, number of layers and activation function).

## Appendix B. Implementation details

All the experiments run on Google Colab Pro with P100 GPU. For GAIN<sup>1</sup>, Sinkhorn, Linear RR<sup>2</sup>, and MIWAE<sup>3</sup>, we use the open-access implementations provided by their authors, with the default or the recommended hyperparameters in their papers except MIWAE. For MIWAE, the default hyperparameters lead to running out RAM, hence we choose `h=128`, `d=10`, `K=20`, `L=1000`. For SoftImpute, the `lambda` hyperparameter is selected at each run through cross-validation and grid-point search, and we choose `maxit=500` and `thresh=1e-05`. For MICE, we use the `iterativeImputer`<sup>4</sup> method in the `scikit-learn` library with default hyperparameters [Pedregosa et al. \(2011\)](#). All NNGP-based methods uses a 3-layer fully connected neural network with ReLU activation function to impute missing values, where the initialization of weight and bias variances are set to 1 and 0 respectively. (We also tried other initialization of weight and bias variances and found that the result is very robust to these changes.) NNGP-based methods are implemented through Neural Tangents [Novak et al. \(2020\)](#). All the MI methods are used to multiply impute missing values for 10 times except GAIN, MIWAE and Linear RR, noting that the GAIN and MIWAE implementations from their authors conduct SI and Linear RR is

1. See <https://github.com/jsyo0n0823/GAIN>

2. Same as Sinkhorn, see <https://github.com/BorisMuzellec/MissingData0T>

3. See <https://github.com/pamattei/miwa>

4. See <https://scikit-learn.org/stable/modules/generated/sklearn.impute.IterativeImputer.html>

computationally very expensive. We also include **not-MIWAE**<sup>5</sup> in the MNAR setting in the appendix. Similar to MIWAE, default hyperparameters of not-MIWAE lead to running out RAM, here we choose  $n_{hidden}=128$ ,  $n_{samples}=20$ , **batch size=16**, **dl=p-1**, **L=1000**, **mprocess='selfmasking known'**. We observe that not-MIWAE is unstable and performs poorly. Probably because not-MIWAE is not scalable to high-dimensional data.

## Appendix C. Synthetic data experiments

### C.1. Continuous data experiment

The simulation results are summarized over 100 Monte Carlo (MC) datasets. We also include not-MIWAE in MNAR. Note that the Each MC dataset has a sample size of  $n = 200$  and includes  $\mathbf{y}$ , the fully observed outcome variable, and  $\mathbf{X} = (\mathbf{x}_1, \dots, \mathbf{x}_p)$ , the set of predictors and auxiliary variables. We consider the setting  $p = 50$ ,  $p = 250$ , and  $p = 1000$  (Here the use of  $p$  is a slight abuse of notation. In the main paper,  $p$  represents total number features which include predictors, auxiliary variables and the response.).  $\mathbf{X}$  is obtained by rearranging the orders of  $\mathbf{A} = (\mathbf{a}_1, \dots, \mathbf{a}_p)$  and  $\mathbf{A}$  is generated from a first order autoregressive model with autocorrelation  $\rho$  and white noise  $\epsilon$ . Here  $\mathbf{a}_1$  is generated from standard normal distribution  $\mathcal{N}(0, 1)$  if  $\epsilon \sim \mathcal{N}(0, 0.1^2)$  or exponential distribution  $\text{Exp}(2)$  if  $\epsilon \sim \text{Exp}(0.4)$ . To obtain  $\mathbf{X}$ , we firstly move the fourth variable in every five consecutive variables of  $\mathbf{A}$  (e.g.  $\mathbf{a}_4$ ,  $\mathbf{a}_9$  and  $\mathbf{a}_{14}$ ) to the right and then the fifth variable in every five consecutive variables of  $\mathbf{A}$  (e.g.  $\mathbf{a}_5$ ,  $\mathbf{a}_{10}$  and  $\mathbf{a}_{15}$ ) to the right. For a concrete example, if  $p = 10$ ,  $(\mathbf{a}_1, \dots, \mathbf{a}_{10})$  becomes  $(\mathbf{a}_1, \mathbf{a}_2, \mathbf{a}_3, \mathbf{a}_6, \mathbf{a}_7, \mathbf{a}_8, \mathbf{a}_4, \mathbf{a}_9, \mathbf{a}_5, \mathbf{a}_{10})$  after rearrangement. The response  $\mathbf{y}$  depends on three variables of  $\mathbf{X}$  indicated by a set  $q$ : given  $\mathbf{X}$ ,  $\mathbf{y}$  is generated from

$$\mathbf{y}_i = \beta_1 \cdot \mathbf{x}_{q[1]} + \beta_2 \cdot \mathbf{x}_{q[2]} + \beta_3 \cdot \mathbf{x}_{q[3]} + \mathcal{N}(0, \sigma_1^2) \quad (4)$$

where  $\beta_i = 1$  for  $i \in \{1, 2, 3\}$ . For  $p = 50$ ,  $p = 250$  and  $p = 1000$ , the corresponding predictor set  $q$  is  $\{40, 44, 48\}$ ,  $\{210, 220, 230\}$  and  $\{650, 700, 750\}$  respectively.

MAR or MNAR mechanism is considered in the simulation and the missing rate is around 40%. In particular, missing values are separately created in  $\{\mathbf{x}_{\frac{3}{5}p+1}, \dots, \mathbf{x}_{\frac{4}{5}p}\}$  and  $\{\mathbf{x}_{\frac{4}{5}p+1}, \dots, \mathbf{x}_p\}$  by using the following logit models for the corresponding missing indicators  $\mathbf{R}_1$  and  $\mathbf{R}_2$ . If the missing mechanism is **MAR**:

$$\text{logit}(\mathbb{P}(\mathbf{R}_1 = 1|\mathbf{X}, \mathbf{y})) = a_1 + a_2 \cdot \frac{5}{3p} \sum_{j=1}^{3p/5} \mathbf{x}_j + a_3 \cdot \mathbf{y} \quad (5)$$

$$\text{logit}(\mathbb{P}(\mathbf{R}_2 = 1|\mathbf{X}, \mathbf{y})) = a_4 + a_5 \cdot \frac{5}{3p} \sum_{j=1}^{3p/5} \mathbf{x}_j + a_6 \cdot \mathbf{y} \quad (6)$$

---

5. See <https://github.com/nbip/notMIWAE>

If the missing mechanism is **MNAR**:

$$\text{logit}(\mathbb{P}(\mathbf{R}_1 = 1|\mathbf{X}, \mathbf{y})) = a_1 + a_2 * \frac{5}{p} \sum_{j=4p/5+1}^p \mathbf{x}_j + a_3 * \mathbf{y} \quad (7)$$

$$\text{logit}(\mathbb{P}(\mathbf{R}_2 = 1|\mathbf{X}, \mathbf{y})) = a_4 + a_5 \cdot \frac{5}{p} \sum_{j=3p/5+1}^{4p/5} \mathbf{x}_j + a_6 \cdot \mathbf{y} \quad (8)$$

If  $\mathbf{R}_1 = 1$  or 0, then  $\{\mathbf{x}_{\frac{3}{5}p+1}, \dots, \mathbf{x}_{\frac{4}{5}p}\}$  is missing or observed, respectively; similarly, if  $\mathbf{R}_2 = 1$  or 0, then  $\{\mathbf{x}_{\frac{4}{5}p+1}, \dots, \mathbf{x}_p\}$  is missing or observed, respectively.

### C.2. Discrete data experiment

In the discrete data analysis, we append one binary variable  $\mathbf{x}_{p+1}$  on the last column of  $\mathbf{X}$  in the above section. We consider the setting  $p = 1000$ . The binary variable is generated through:

$$\mathbf{x}_{p+1} = \begin{cases} 1 & \text{if } \mathbf{x}_{10} + \mathbf{x}_{50} + \mathbf{x}_{100} > 0 \\ 0 & \text{otherwise} \end{cases}.$$

The fully observed response  $\mathbf{y}$  is also generated from eq. (4) and the corresponding predictor set  $q$  is  $\{1001, 701, 751\}$ . Hence  $\beta_1$  is the coefficient of the binary variable in the regression model. Here missing values are separately created in  $\{\mathbf{x}_{\frac{3}{5}p+1}, \dots, \mathbf{x}_{\frac{4}{5}p}\}$  and  $\{\mathbf{x}_{\frac{4}{5}p+1}, \dots, \mathbf{x}_p\}$  with the corresponding missing indicators  $\mathbf{R}_1$  and  $\mathbf{R}_2$ , which are also generated from (5), (6) or (7), (8) depending on the specific missing mechanism.

Before MI-NNGPs impute, the binary variable is encoded into an one-hot, zero-mean vector (i.e. entries of -0.5 for the incorrect class and 0.5 for the correct class). After imputing this one-hot vector in the incomplete cases, the class with higher value is regarded as the imputation class.

### C.3. Experiment setting

- Table 2: Continuous data experiment, MAR,  $n = 200$ ,  $p = 250$ ,  $\rho = 0.95$ ,  $\epsilon \sim \mathcal{N}(0, 0.1^2)$ ,  $\sigma_1 = 0.5$ ,  $a_1 = 1$ ,  $a_2 = -2$ ,  $a_3 = 3$ ,  $a_4 = 0$ ,  $a_5 = 2$ ,  $a_6 = -2$
- Table 3: Continuous data experiment, MAR,  $n = 200$ ,  $p = 1000$ ,  $\rho = 0.95$ ,  $\epsilon \sim \mathcal{N}(0, 0.1^2)$ ,  $\sigma_1 = 0.5$ ,  $a_1 = 1$ ,  $a_2 = -2$ ,  $a_3 = 3$ ,  $a_4 = 0$ ,  $a_5 = 2$ ,  $a_6 = -2$
- Table 11: Discrete data experiment, MAR,  $n = 200$ ,  $p = 1000$ ,  $\rho = 0.95$ ,  $\epsilon \sim \mathcal{N}(0, 0.1^2)$ ,  $\sigma_1 = 0.5$ ,  $a_1 = -1$ ,  $a_2 = -2$ ,  $a_3 = 3$ ,  $a_4 = 1$ ,  $a_5 = 2$ ,  $a_6 = -2$
- Table 5: Continuous data experiment, MAR,  $n = 200$ ,  $p = 50$ ,  $\rho = 0.95$ ,  $\epsilon \sim \mathcal{N}(0, 0.1^2)$ ,  $\sigma_1 = 0.5$ ,  $a_1 = 1$ ,  $a_2 = -2$ ,  $a_3 = 3$ ,  $a_4 = 0$ ,  $a_5 = 2$ ,  $a_6 = -2$
- Table 6: Continuous data experiment, MAR,  $n = 200$ ,  $p = 1000$ ,  $\rho = 0.75$ ,  $\epsilon \sim \text{Exp}(0.4)$ ,  $\sigma_1 = 1$ ,  $a_1 = -3$ ,  $a_2 = -1$ ,  $a_3 = 1.5$ ,  $a_4 = 1$ ,  $a_5 = 1.5$ ,  $a_6 = -1$

- Table 7: Continuous data experiment, MNAR,  $n = 200$ ,  $p = 50$ ,  $\rho = 0.95$ ,  $\epsilon \sim \mathcal{N}(0, 0.1^2)$ ,  $\sigma_1 = 0.5$ ,  $a_1 = 1$ ,  $a_2 = -2$ ,  $a_3 = 3$ ,  $a_4 = 0$ ,  $a_5 = 2$ ,  $a_6 = -2$
- Table 8: Continuous data experiment, MNAR,  $n = 200$ ,  $p = 250$ ,  $\rho = 0.95$ ,  $\epsilon \sim \mathcal{N}(0, 0.1^2)$ ,  $\sigma_1 = 0.5$ ,  $a_1 = 1$ ,  $a_2 = -2$ ,  $a_3 = 3$ ,  $a_4 = 0$ ,  $a_5 = 2$ ,  $a_6 = -2$
- Table 9: Continuous data experiment, MNAR,  $n = 200$ ,  $p = 1000$ ,  $\rho = 0.95$ ,  $\epsilon \sim \mathcal{N}(0, 0.1^2)$ ,  $\sigma_1 = 0.5$ ,  $a_1 = 1$ ,  $a_2 = -2$ ,  $a_3 = 3$ ,  $a_4 = 0$ ,  $a_5 = 2$ ,  $a_6 = -2$
- Table 10: Continuous data experiment, MNAR,  $n = 200$ ,  $p = 1000$ ,  $\rho = 0.75$ ,  $\epsilon \sim \text{Exp}(0.4)$ ,  $\sigma_1 = 1$ ,  $a_1 = -3$ ,  $a_2 = -1$ ,  $a_3 = 1.5$ ,  $a_4 = 1$ ,  $a_5 = 1.5$ ,  $a_6 = -1$
- Table 12: Discrete data experiment, MNAR,  $n = 200$ ,  $p = 1000$ ,  $\rho = 0.95$ ,  $\epsilon \sim \mathcal{N}(0, 0.1^2)$ ,  $\sigma_1 = 0.5$ ,  $a_1 = -1$ ,  $a_2 = -2$ ,  $a_3 = 3$ ,  $a_4 = 1$ ,  $a_5 = 2$ ,  $a_6 = -2$

| Models        | Style | Time(s) | Imp MSE       | Bias( $\hat{\beta}_1$ ) | CR( $\hat{\beta}_1$ ) | SE( $\hat{\beta}_1$ ) | SD( $\hat{\beta}_1$ ) |
|---------------|-------|---------|---------------|-------------------------|-----------------------|-----------------------|-----------------------|
| SoftImpute    | SI    | 2.7     | <b>0.0132</b> | <b>-0.0017</b>          | <b>0.92</b>           | 0.0623                | 0.0642                |
| GAIN          | SI    | 35.9    | 1.356         | 0.3213                  | 0.38                  | 0.1142                | 0.4262                |
| MIWAE         | SI    | 46.5    | 0.0361        | -0.0238                 | 0.90                  | 0.0632                | 0.0738                |
| Linear RR     | SI    | 628.4   | 0.1712        | <b>0.0358</b>           | 0.91                  | 0.1287                | 0.1568                |
| MICE          | MI    | 2.1     | 0.0200        | <b>0.0031</b>           | <b>0.97</b>           | 0.0644                | 0.0567                |
| Sinkhorn      | MI    | 42.1    | 0.1081        | -0.1225                 | 0.60                  | 0.0978                | 0.1269                |
| MI-NNGP1      | MI    | 3.4     | <b>0.0129</b> | <b>0.0048</b>           | <b>0.95</b>           | 0.0621                | 0.0647                |
| MI-NNGP1-BS   | MI    | 4.8     | <b>0.0177</b> | <b>0.0052</b>           | <b>0.97</b>           | 0.0794                | 0.0624                |
| MI-NNGP2      | MI    | 5.5     | <b>0.0092</b> | <b>0.0083</b>           | <b>0.96</b>           | 0.0639                | 0.0563                |
| MI-NNGP2-BS   | MI    | 13.5    | <b>0.0105</b> | <b>0.0083</b>           | <b>0.98</b>           | 0.0705                | 0.0574                |
| Complete data | -     | -       | -             | 0.0025                  | 0.98                  | 0.0605                | 0.0524                |
| Complete case | -     | -       | -             | 0.1869                  | 0.79                  | 0.2298                | 0.2419                |
| ColMean Imp   | SI    | -       | 0.4716        | 0.5312                  | 0.28                  | 0.2242                | 0.1729                |

Table 5: Gaussian data with  $n = 200$  and  $p = 51$  under MAR. Approximately **40%** features and **92%** cases contain missing values.

#### C.4. Varying missing rates experiment

Here we state clearly the varying missing rates experiment. Similar to the data generation process in the continuous data experiment, each MC dataset has sample size of  $n = 200$  and each sample includes a response  $y$  and  $p = 1000$  features. When generating variable set  $\mathbf{A}$ ,  $\mathbf{a}_1$  is drawn from  $\mathcal{N}(0, 1)$  and the remaining variables are generated through first order autoregressive model with autocorrelation  $\rho = 0.95$  and white noise  $\mathcal{N}(0, 0.1^2)$ .  $\mathbf{X}$  is obtained by firstly moving the seventh variable and ninth variable in every ten consecutive variables of  $\mathbf{A}$  (e.g.,  $\mathbf{a}_7$ ,  $\mathbf{a}_9$ ,  $\mathbf{a}_{17}$  and  $\mathbf{a}_{19}$ ) to the right and then the eighth variable and tenth variable in every ten consecutive variables of  $\mathbf{A}$  (e.g.,  $\mathbf{a}_8$ ,  $\mathbf{a}_{10}$ ,  $\mathbf{a}_{18}$  and  $\mathbf{a}_{20}$ ) to the right. Given  $\mathbf{X}$ ,  $\mathbf{y}$  is generated from (4) with corresponding predictor set  $q = \{910, 950, 990\}$ . Missing values are separately created in two groups of variables under MAR by using the

| Models        | Style | Time(s) | Imp MSE       | Bias( $\hat{\beta}_1$ ) | CR( $\hat{\beta}_1$ ) | SE( $\hat{\beta}_1$ ) | SD( $\hat{\beta}_1$ ) |
|---------------|-------|---------|---------------|-------------------------|-----------------------|-----------------------|-----------------------|
| SoftImpute    | SI    | 37.8    | 0.6284        | -0.5896                 | 0.92                  | 0.6348                | 0.4858                |
| GAIN          | SI    | 130.9   | 1.691         | -0.7217                 | 0.40                  | 0.4611                | 2.229                 |
| MIWAE         | SI    | 58.4    | 1.530         | 0.5626                  | 0.05                  | 0.1522                | 0.1456                |
| Sinkhorn      | MI    | 42.1    | 0.3845        | -0.2077                 | 1.00                  | 0.4566                | 0.2832                |
| MI-NNGP1      | MI    | 3.1     | 0.3296        | <b>-0.0421</b>          | 0.75                  | 0.1757                | 0.3220                |
| MI-NNGP1-BS   | MI    | 3.4     | 0.4543        | -0.0570                 | 1.00                  | 0.3366                | 0.2466                |
| MI-NNGP2      | MI    | 3.9     | <b>0.2358</b> | 0.1098                  | 0.80                  | 0.2312                | 0.3383                |
| MI-NNGP2-BS   | MI    | 10.3    | <b>0.2516</b> | <b>-0.0242</b>          | <b>0.95</b>           | 0.3203                | 0.3037                |
| Complete data | -     | -       | -             | 0.0156                  | 0.95                  | 0.0978                | 0.0938                |
| Complete case | -     | -       | -             | 0.1726                  | 0.89                  | 0.3984                | 0.4534                |
| ColMean Imp   | SI    | -       | 0.3794        | -0.1506                 | 1.00                  | 0.4556                | 0.3123                |

Table 6: Exponential data with  $n = 200$  and  $p = 1001$  under MAR. Approximately **40%** features and **92%** cases contain missing values. Here Linear RR and MICE are not included due to running out of RAM.

| Models        | Style | Time(s) | Imp MSE       | Bias( $\hat{\beta}_1$ ) | CR( $\hat{\beta}_1$ ) | SE( $\hat{\beta}_1$ ) | SD( $\hat{\beta}_1$ ) |
|---------------|-------|---------|---------------|-------------------------|-----------------------|-----------------------|-----------------------|
| SoftImpute    | SI    | 2.1     | <b>0.0119</b> | <b>-0.0053</b>          | <b>0.93</b>           | 0.0624                | 0.0611                |
| GAIN          | SI    | 35.9    | 1.4822        | 0.4448                  | 0.24                  | 0.1187                | 0.4641                |
| MIWAE         | SI    | 46.5    | 0.0361        | -0.0238                 | 0.90                  | 0.0632                | 0.0738                |
| not-MIWAE     | SI    | 40.8    | 0.7566        | -0.0436                 | 0.91                  | 0.0518                | 0.0969                |
| Linear RR     | SI    | 407     | 0.1760        | <b>0.0412</b>           | 0.91                  | 0.1314                | 0.1567                |
| Sinkhorn      | MI    | 27.9    | 0.1103        | -0.1340                 | 0.63                  | 0.1006                | 0.1278                |
| MICE          | MI    | 2.1     | 0.0198        | <b>0.0036</b>           | <b>0.98</b>           | 0.0636                | 0.0559                |
| MI-NNGP1      | MI    | 4.7     | <b>0.0130</b> | <b>0.0027</b>           | <b>0.95</b>           | 0.0621                | 0.0651                |
| MI-NNGP1-BS   | MI    | 3.9     | <b>0.0177</b> | <b>0.0026</b>           | <b>0.97</b>           | 0.0799                | 0.0631                |
| MI-NNGP2      | MI    | 10.4    | <b>0.0088</b> | <b>0.0085</b>           | <b>0.96</b>           | 0.0614                | 0.0536                |
| MI-NNGP2-BS   | MI    | 10.1    | <b>0.0106</b> | <b>0.0093</b>           | <b>0.97</b>           | 0.0711                | 0.0564                |
| Complete data | -     | -       | -             | 0.0025                  | 0.98                  | 0.0605                | 0.0524                |
| Complete case | -     | -       | -             | 0.2143                  | 0.78                  | 0.2340                | 0.4201                |
| ColMean Imp   | SI    | -       | 0.4772        | 0.5597                  | 0.24                  | 0.2246                | 0.1720                |

Table 7: Gaussian data with  $n = 200$  and  $p = 51$  under MNAR. Approximately **40%** features and **92%** cases contain missing values.

following logit models for the corresponding missing indicators  $\mathbf{R}_1$  and  $\mathbf{R}_2$ :

$$\text{logit}(\mathbb{P}(\mathbf{R}_1 = 1|\mathbf{X}, \mathbf{y})) = 1 - \frac{1}{50} \sum_{j=1}^{100} \mathbf{x}_j + 3\mathbf{y}$$

$$\text{logit}(\mathbb{P}(\mathbf{R}_2 = 1|\mathbf{X}, \mathbf{y})) = \frac{1}{50} \sum_{j=1}^{100} \mathbf{x}_j - 2\mathbf{y}$$

If the missing rate is 20%, the first group is  $\{\mathbf{x}_{801}, \dots, \mathbf{x}_{900}\}$  and the second group is  $\{\mathbf{x}_{901}, \dots, \mathbf{x}_{1000}\}$ . If the missing rate is 40%, the first group is  $\{\mathbf{x}_{601}, \dots, \mathbf{x}_{800}\}$  and the second group is  $\{\mathbf{x}_{801}, \dots, \mathbf{x}_{1000}\}$ . If the missing rate is 60%, the first group is  $\{\mathbf{x}_{401}, \dots, \mathbf{x}_{700}\}$  and the second group is  $\{\mathbf{x}_{701}, \dots, \mathbf{x}_{1000}\}$ . If the missing rate is 80%, the first group is  $\{\mathbf{x}_{201}, \dots, \mathbf{x}_{600}\}$  and the second group is  $\{\mathbf{x}_{601}, \dots, \mathbf{x}_{1000}\}$ .

| Models        | Style | Time(s) | Imp MSE       | Bias( $\hat{\beta}_1$ ) | CR( $\hat{\beta}_1$ ) | SE( $\hat{\beta}_1$ ) | SD( $\hat{\beta}_1$ ) |
|---------------|-------|---------|---------------|-------------------------|-----------------------|-----------------------|-----------------------|
| SoftImpute    | SI    | 15.3    | 0.0194        | -0.0997                 | 0.84                  | 0.1182                | 0.1358                |
| GAIN          | SI    | 53.2    | 0.8618        | 0.6212                  | 0.18                  | 0.1502                | 0.5088                |
| MIWAE         | SI    | 47.6    | 0.0502        | 0.0695                  | 0.90                  | 0.1356                | 0.1410                |
| not-MIWAE     | SI    | 41.7    | 1.4701        | 0.1040                  | 0.65                  | 0.1084                | 0.1624                |
| Linear RR     | SI    | 3009.6  | 0.0658        | 0.1823                  | 0.90                  | 0.1782                | 0.0935                |
| MICE          | MI    | 48.6    | 0.0233        | <b>-0.0049</b>          | <b>0.93</b>           | 0.1160                | 0.1244                |
| Sinkhorn      | MI    | 29.9    | 0.0757        | <b>0.0117</b>           | <b>0.97</b>           | 0.1839                | 0.1523                |
| MI-NNGP1      | MI    | 3.4     | <b>0.0116</b> | <b>0.0069</b>           | <b>0.93</b>           | 0.1147                | 0.1215                |
| MI-NNGP1-BS   | MI    | 3.4     | <b>0.0149</b> | <b>0.0140</b>           | <b>0.96</b>           | 0.1285                | 0.1179                |
| MI-NNGP2      | MI    | 10.4    | <b>0.0085</b> | <b>-0.0024</b>          | <b>0.95</b>           | 0.1123                | 0.1148                |
| MI-NNGP2-BS   | MI    | 10.3    | <b>0.0094</b> | <b>-0.0018</b>          | <b>0.96</b>           | 0.1177                | 0.1147                |
| Complete data | -     | -       | -             | -0.0027                 | 0.90                  | 0.1098                | 0.1141                |
| Complete case | -     | -       | -             | 0.2518                  | 0.89                  | 0.3385                | 0.3319                |
| ColMean Imp   | SI    | -       | 0.1414        | 0.3539                  | 0.72                  | 0.2210                | 0.1712                |

Table 8: Gaussian data with  $n = 200$  and  $p = 251$  under MNAR. Approximately **40%** features and **90%** cases contain missing values.

| Models        | Style | Time(s) | Imp MSE       | Bias( $\hat{\beta}_1$ ) | CR( $\hat{\beta}_1$ ) | SE( $\hat{\beta}_1$ ) | SD( $\hat{\beta}_1$ ) |
|---------------|-------|---------|---------------|-------------------------|-----------------------|-----------------------|-----------------------|
| SoftImpute    | SI    | 25.1    | 0.0443        | -0.2550                 | 0.52                  | 0.1570                | 0.2164                |
| GAIN          | SI    | 111.1   | 0.7395        | 0.6488                  | 0.18                  | 0.1719                | 0.5830                |
| MIWAE         | SI    | 53.2    | 0.1116        | 0.5249                  | 0.35                  | 0.1902                | 0.2523                |
| not-MIWAE     | SI    | 45.4    | 3.981         | 0.9897                  | 0.0                   | 0.1080                | 0.1451                |
| Sinkhorn      | MI    | 116.9   | 0.0889        | 0.5445                  | 0.38                  | 0.2406                | 0.2237                |
| MI-NNGP1      | MI    | 4.9     | <b>0.0119</b> | <b>0.0351</b>           | 0.89                  | 0.1194                | 0.1422                |
| MI-NNGP1-BS   | MI    | 4.9     | <b>0.0166</b> | <b>0.0383</b>           | <b>0.94</b>           | 0.1424                | 0.1416                |
| MI-NNGP2      | MI    | 10.5    | <b>0.0085</b> | <b>0.0356</b>           | 0.91                  | 0.1160                | 0.1310                |
| MI-NNGP2-BS   | MI    | 9.9     | <b>0.0092</b> | <b>0.0343</b>           | <b>0.93</b>           | 0.1263                | 0.1301                |
| Complete data | -     | -       | -             | 0.0350                  | 0.94                  | 0.1122                | 0.1173                |
| Complete case | -     | -       | -             | 0.2824                  | 0.76                  | 0.3447                | 0.4201                |
| ColMean Imp   | SI    | -       | 0.1130        | 0.7022                  | 0.11                  | 0.2572                | 0.1941                |

Table 9: Gaussian data with  $n = 200$  and  $p = 1001$  under MNAR. Approximately **40%** features and **90%** cases contain missing values. Here Linear RR and MICE are not included due to running out of RAM.

## Appendix D. ADNI data experiments

### D.1. Data Availability

The de-identified ADNI dataset is publicly available at <http://adni.loni.usc.edu/>.

### D.2. Experiment details

This section details the ADNI data experiment. Here we use a large-scale dataset from ADNI study. The original dataset includes 19822 features and one continuous response variable ( $y$ ), the VBM right hippocampal volume, for 649 patients. Here we preprocess features and the response by removing their means. Among these 19822 features, we only select 10000 features which have maximal correlation with the response to analyze and rank them in the

| Models        | Style | Time(s) | Imp MSE       | Bias( $\hat{\beta}_1$ ) | CR( $\hat{\beta}_1$ ) | SE( $\hat{\beta}_1$ ) | SD( $\hat{\beta}_1$ ) |
|---------------|-------|---------|---------------|-------------------------|-----------------------|-----------------------|-----------------------|
| SoftImpute    | SI    | 39.1    | 0.6682        | -0.6784                 | 0.90                  | 0.6805                | 0.4632                |
| GAIN          | SI    | 91.0    | 1.6974        | 0.0331                  | 0.33                  | 0.4187                | 2.2123                |
| MIWAE         | SI    | 57.4    | 1.4937        | 0.3981                  | 0.30                  | 0.1437                | 0.1659                |
| not-MIWAE     | SI    | 43.6    | 26.7277       | 0.7388                  | 0.00                  | 0.0928                | 0.1524                |
| Sinkhorn      | MI    | 53.2    | 0.3837        | -0.2698                 | 1.0                   | 0.4362                | 0.2886                |
| MI-NNGP1      | MI    | 3.5     | 0.3296        | <b>-0.0354</b>          | 0.76                  | 0.1764                | 0.3166                |
| MI-NNGP1-BS   | MI    | 3.6     | 0.4545        | -0.0546                 | 0.99                  | 0.3324                | 0.2466                |
| MI-NNGP2      | MI    | 4.1     | <b>0.2360</b> | 0.0835                  | 0.82                  | 0.2301                | 0.3327                |
| MI-NNGP2-BS   | MI    | 10.3    | <b>0.2501</b> | <b>-0.0449</b>          | <b>0.94</b>           | 0.3183                | 0.3043                |
| Complete data | -     | -       | -             | 0.0156                  | 0.95                  | 0.0978                | 0.0938                |
| Complete case | -     | -       | -             | 0.1663                  | 0.89                  | 0.4038                | 0.4639                |
| ColMean Imp   | SI    | -       | 0.3793        | -0.1574                 | 1.0                   | 0.4559                | 0.3087                |

Table 10: Exponential data with  $n = 200$  and  $p = 1001$  under MNAR. Approximately **40%** features and **92%** cases contain missing values. Here Linear RR and MICE are not included due to running out of RAM.

| Models        | Style | Time(s) | Imp MSE       | Imp accu      | Bias( $\hat{\beta}_1$ ) | CR( $\hat{\beta}_1$ ) | SE( $\hat{\beta}_1$ ) | SD( $\hat{\beta}_1$ ) |
|---------------|-------|---------|---------------|---------------|-------------------------|-----------------------|-----------------------|-----------------------|
| SoftImpute    | SI    | 21.8    | 0.0431        | 0.3331        | -0.2793                 | 0.64                  | 0.2156                | 0.2263                |
| GAIN          | SI    | 98.9    | 0.8942        | 0.3331        | 0.8610                  | 0.24                  | 0.1588                | 0.7651                |
| MIWAE         | SI    | 57.7    | 0.1267        | 0.6785        | 0.6658                  | 0.04                  | 0.1617                | 0.2030                |
| Sinkhorn      | MI    | 41.6    | 0.1076        | 0.3278        | 0.4201                  | 0.73                  | 0.3036                | 0.2883                |
| MI-NNGP1      | MI    | 4.7     | <b>0.0116</b> | 0.6463        | <b>-0.0147</b>          | <b>0.94</b>           | 0.1492                | 0.1495                |
| MI-NNGP1-BS   | MI    | 3.4     | <b>0.0145</b> | 0.6188        | <b>-0.0115</b>          | <b>0.98</b>           | 0.1771                | 0.1436                |
| MI-NNGP2      | MI    | 3.9     | <b>0.0089</b> | <b>0.7289</b> | <b>0.0126</b>           | 0.99                  | 0.1470                | 0.1247                |
| MI-NNGP2-BS   | MI    | 9.5     | <b>0.0093</b> | <b>0.7006</b> | <b>-0.0014</b>          | <b>0.98</b>           | 0.1556                | 0.1258                |
| Complete data | -     | -       | -             | -             | 0.0156                  | 0.96                  | 0.1119                | 0.1041                |
| Complete case | -     | -       | -             | -             | 0.3856                  | 0.70                  | 0.2846                | 0.2937                |
| ColMean Imp   | SI    | -       | 0.1255        | 0.3278        | 0.4643                  | 0.71                  | 0.3000                | 0.2362                |

Table 11: Gaussian and binary data with  $n = 200$  and  $p = 1002$  under MAR. Approximately **40%** features and **88%** cases contain missing values. Linear RR and MICE are not included due to running out of RAM. Detailed simulation setup information is in appendix.

decreasing order of correlation. Denote the selected features by  $\mathbf{X} = (\mathbf{x}_1, \dots, \mathbf{x}_{1000})$ . In the analysis model, the first three features are chosen as predictors and our goal is to fit the regression model  $\mathbb{E}[\mathbf{y} | \mathbf{x}_1, \mathbf{x}_2, \mathbf{x}_3] = \beta_0 + \beta_1 \mathbf{x}_1 + \beta_2 \mathbf{x}_2 + \beta_3 \mathbf{x}_3$  and analyze the first coefficient  $\beta_1$ .

There are no missing values in the original data, so we artificially introduce some missing values, which are separately created in two groups:  $\{\mathbf{x}_1, \dots, \mathbf{x}_{1000}\}$  and  $\{\mathbf{x}_{1001}, \dots, \mathbf{x}_{2000}\}$  by the following logit models for the corresponding missing indicator  $\mathbf{R}_1$  and  $\mathbf{R}_2$ . If the



| Models        | Style | Time(s) | Imp MSE       | Imp accu      | Bias( $\hat{\beta}_1$ ) | CR( $\hat{\beta}_1$ ) | SE( $\hat{\beta}_1$ ) | SD( $\hat{\beta}_1$ ) |
|---------------|-------|---------|---------------|---------------|-------------------------|-----------------------|-----------------------|-----------------------|
| SoftImpute    | SI    | 24.7    | 0.0432        | 0.3328        | -0.2771                 | 0.64                  | 0.2154                | 0.2263                |
| GAIN          | SI    | 95.3    | 0.8517        | 0.3328        | 0.9779                  | 0.12                  | 0.1605                | 0.7701                |
| MIWAE         | SI    | 57.7    | 0.1258        | 0.6706        | 0.6665                  | 0.15                  | 0.1604                | 0.2274                |
| not-MIWAE     | SI    | 42.7    | 1.9305        | 0.3317        | 0.6158                  | 0.06                  | 0.0851                | 0.1876                |
| Sinkhorn      | MI    | 43.6    | 0.1080        | 0.3273        | 0.4175                  | 0.72                  | 0.3033                | 0.2882                |
| MI-NNGP1      | MI    | 3.6     | <b>0.0117</b> | 0.6477        | <b>-0.0137</b>          | <b>0.94</b>           | 0.1492                | 0.1514                |
| MI-NNGP1-BS   | MI    | 3.7     | <b>0.0146</b> | 0.6201        | <b>-0.0154</b>          | <b>0.98</b>           | 0.1785                | 0.1423                |
| MI-NNGP2      | MI    | 4.2     | <b>0.0089</b> | <b>0.7277</b> | <b>0.0125</b>           | 0.99                  | 0.1469                | 0.1238                |
| MI-NNGP2-BS   | MI    | 10.0    | <b>0.0093</b> | <b>0.6971</b> | <b>-0.0044</b>          | <b>0.98</b>           | 0.1558                | 0.1243                |
| Complete data | -     | -       | -             | -             | 0.0156                  | 0.96                  | 0.1119                | 0.1041                |
| Complete case | -     | -       | -             | 0.3909        | 0.70                    | -                     | 0.2854                | 0.3001                |
| ColMean Imp   | SI    | -       | 0.1259        | 0.3273        | 0.4620                  | 0.71                  | 0.2996                | 0.2367                |

Table 12: Gaussian and binary data with  $n = 200$  and  $p = 1002$  under MNAR. Approximately **40%** features and **88%** cases contain missing values. Here Linear RR and MICE are not included due to running out of RAM.

missing mechanism is **MAR**:

$$\begin{aligned} \text{logit}(\mathbb{P}(\mathbf{R}_1 = 1)) &= -1 - \frac{3}{100} \sum_{j=2001}^{2100} \mathbf{x}_j + 3\mathbf{y} \\ \text{logit}(\mathbb{P}(\mathbf{R}_2 = 1)) &= -1 - \frac{3}{100} \sum_{j=2201}^{2300} \mathbf{x}_j + 2\mathbf{y} \end{aligned}$$

If the missing mechanism is **MNAR**:

$$\begin{aligned} \text{logit}(\mathbb{P}(\mathbf{R}_1 = 1)) &= -1 - \frac{3}{5} \sum_{j=1001}^{1005} \mathbf{x}_j + 3\mathbf{y} \\ \text{logit}(\mathbb{P}(\mathbf{R}_2 = 1)) &= -1 - \frac{3}{5} \sum_{j=1}^5 \mathbf{x}_j + 2\mathbf{y} \end{aligned}$$

We repeat the above procedure for 100 times to generate 100 incomplete datasets. Each incomplete dataset only differs in location of missing values and therefore they are not Monte Carlo datasets (which is the reason that we do not include the  $\text{SD}(\hat{\beta}_1)$  in this experiment). We impute the incomplete datasets and present the summarized results.

| Models        | Style | Time(s) | Imp MSE       | $\hat{\beta}_1$ | $SE(\hat{\beta}_1)$ |
|---------------|-------|---------|---------------|-----------------|---------------------|
| SoftImpute    | SI    | 991.5   | <b>0.0613</b> | 0.0212          | 0.0114              |
| Sinkhorn      | MI    | 709.8   | 0.0866        | 0.0216          | 0.0123              |
| MI-NNGP1      | MI    | 7.4     | <b>0.0644</b> | <b>0.0155</b>   | 0.0101              |
| MI-NNGP1-BS   | MI    | 7.7     | <b>0.0688</b> | <b>0.0162</b>   | 0.0112              |
| MI-NNGP2      | MI    | 11.6    | <b>0.0622</b> | <b>0.0145</b>   | 0.0103              |
| MI-NNGP2-BS   | MI    | 18.5    | <b>0.0609</b> | 0.0123          | 0.0125              |
| Complete data | -     | -       | -             | 0.0160          | 0.0085              |
| Complete case | -     | -       | -             | 0.0202          | 0.0172              |
| ColMean Imp   | SI    | -       | 0.1685        | 0.01776         | 0.0130              |

Table 13: Real data experiment with  $n = 649$  and  $p = 10001$  under MNAR. Approximately **20%** features and **74%** cases contain missing values. Linear RR, MICE, not-MIWAE and GAIN are not included due to running out of RAM.
